# Supplementary material for: ComEA Is Essential for the Transfer of External DNA into the Periplasm in Naturally Transformable Vibrio cholerae Cells
Source: PLOS journal article supplement (doi:10.1371/journal.pgen.1004066), 2014-01-02
Supplement: S2 (10.1371/journal.pgen.1004066.s002) [file journal.pgen.1004066.s002]

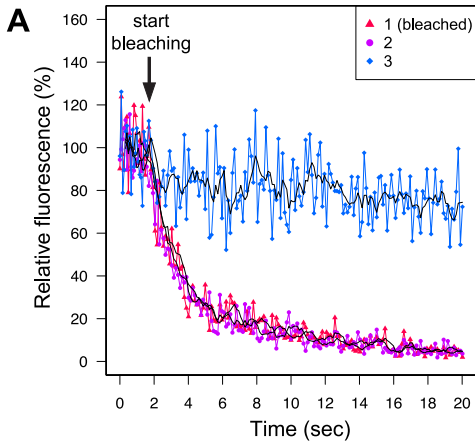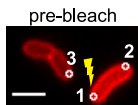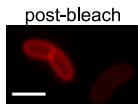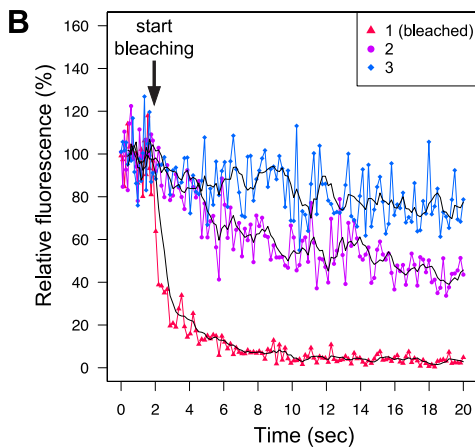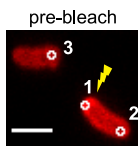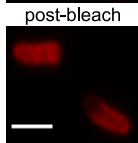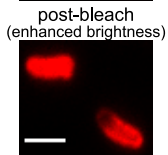

**Fig. S2**
